# Supplementary material for: Validity of the Norwegian Version of the Needs and Provision Complexity Scale (NPCS) in Patients with Traumatic Brain Injury and Atraumatic Subarachnoid Hemorrhage
Source: MDPI journal article supplement (doi:10.3390/jcm13030752), 2024-01-28
Supplement: s1 [file s1]

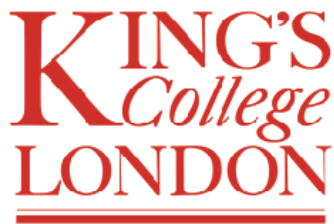

**University of London**

**The North West London Hospitals**

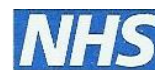

NHS Trust

# **Skala for behovs- og tjenestekompleksitet ved kroniske nevrologiske sykdommer (NPCS)**

## **Versjon for pasienter**

Skjemaet kan brukes og kopieres fritt,

*men må ha referanse til opphavspersonene ved bruk i publikasjoner*

**For mer informasjon og råd, ta kontakt med:**

Professor Lynne Turner-Stokes DM FRCP  
Herbert Dunhill Chair of Rehabilitation, King's College London.

Norsk versjon 2.0 - 2017

# NPCS: BEHOV FOR OMSORG OG STØTTE

Dagens dato:      Dag   Måned   År

## Nåværende rehabiliterings- og støttetjenester

- Vi vil gjerne vite noe om de omsorgs- og støttetjenestene du mottar nå.
- Vi vil spørre deg om 12 områder der du vil kunne få støtte fra enten helsetjenesten eller sosialtjenesten.
- Vi er også interessert i om hvorvidt du mener at denne støtten gis i riktig omfang for øyeblikket, eller om du synes at du trenger mer støtte eller mindre støtte for at du skal være fornøyd og ha et godt liv.

(NB til intervjueren – hvis omsorg ikke gis i riktig omfang, prøv å fastslå hva de mener at de trenger (skriv ned med deres egne ord), og pass dette inn på det mest relevante nivået i skjemaet)

## For hvert av spørsmålene under vil vi gjerne vite noe om:

1. Omfanget av omsorg og støtte du har fått **i løpet av de siste seks månedene**.
2. Hvorvidt denne omsorgen og støtten gis i riktig omfang, eller hvorvidt du mener at du ville ha nytte av mer eller mindre omsorg enn det nivået du har mottatt.

Hvis mer enn ett svaralternativ passer, velger du det som står lengst ned på listen

### For eksempel:

Hvis du er under regelmessig oppfølging fra fastlegen din, og ble undersøkt i løpet av de siste seks månedene,  
men også trenger tilsyn av en spesialist av og til,  
vil du merke av på denne måten:

|                                                                                           | Ja                                  | Nei                      |
|-------------------------------------------------------------------------------------------|-------------------------------------|--------------------------|
| Får du regelmessig medisinsk oppfølging?                                                  | <input checked="" type="checkbox"/> | <input type="checkbox"/> |
| Hvis 'ja':                                                                                |                                     |                          |
| <b>Trenger medisinsk tilsyn/tiltak:</b>                                                   | <b>Kryss av én</b>                  |                          |
| a) Regelmessige besøk hos fastlege for tilsyn/behandling                                  | <input type="checkbox"/>            |                          |
| b) Trenger av og til råd/tilsyn fra spesialist<br>(f.eks. 1-2 besøk i året)               | <input checked="" type="checkbox"/> |                          |
| c) Trenger regelmessig behandling hos spesialist<br>(f.eks. tre eller flere besøk i året) | <input type="checkbox"/>            |                          |

**Denne delen handler om hvor mye medisinsk oppfølging og sykepleie du mottar**

**1. MEDISINSK OPPFØLGING**

Vi ønsker å vite noe om **oppfølgingen du har mottatt fra en lege (fastlege eller spesialist) for utredning, tilsyn eller behandling**

- Bidrag fra spesialist kan være innenfor alle medisinske spesialiteter

|                                                                                           | Ja                       | Nei                      |
|-------------------------------------------------------------------------------------------|--------------------------|--------------------------|
| Får du regelmessig <b>medisinsk oppfølging</b> ?                                          | <input type="checkbox"/> | <input type="checkbox"/> |
| Hvis 'ja':                                                                                |                          |                          |
| <b>Dette omfatter:</b>                                                                    | <u>Flere kryss mulig</u> |                          |
| a) Regelmessige besøk hos fastlege for tilsyn/behandling                                  | <input type="checkbox"/> |                          |
| b) Trenger av og til råd/undersøkelse hos spesialist<br>(f.eks. 1-2 besøk i året)         | <input type="checkbox"/> |                          |
| c) Trenger regelmessig behandling hos spesialist<br>(f.eks. tre eller flere besøk i året) | <input type="checkbox"/> |                          |

**Hvilke(n) type(r) spesialist?**

Flere kryss mulig

|                                                                  |                          |
|------------------------------------------------------------------|--------------------------|
| Nevrolog                                                         | <input type="checkbox"/> |
| Lege som er spesialist i rehabilitering                          | <input type="checkbox"/> |
| Psykiater                                                        | <input type="checkbox"/> |
| Lege som er spesialist innen palliativ medisin                   | <input type="checkbox"/> |
| Annet, vennligst spesifiser: ..... (f.eks. nevrokirurg, ortoped) | <input type="checkbox"/> |

**2. OPPFØLGING FRA SPESIALSYKEPLEIER**

Vi ønsker å få vite hvilket **nivå av støtte / intervensjon du har fått fra spesialsykepleiere/spesialtreneede sykepleiere**.  
F.eks. for sårpleie, håndtering av blære-/tarmfunksjonen / tilsyn med medisinbruk / spesialisert rådgivning / støtte / veiledning)

|                                                                                                                  | Ja                       | Nei                      |
|------------------------------------------------------------------------------------------------------------------|--------------------------|--------------------------|
| Har du fått <b>støtte av en spesialsykepleier/spesialtreneede sykepleiere</b> i løpet av de siste seks månedene: | <input type="checkbox"/> | <input type="checkbox"/> |
| Hvis 'ja':                                                                                                       |                          |                          |
| <b>Har fått støtte:</b>                                                                                          | <u>Kryss av én</u>       |                          |
| a) Av og til (f.eks. én gang i måneden eller sjeldnere)                                                          | <input type="checkbox"/> |                          |
| b) Regelmessig (f.eks. hver eller annenhver uke)                                                                 | <input type="checkbox"/> |                          |
| c) Ofte (f.eks. hver dag eller flere ganger i uken)                                                              | <input type="checkbox"/> |                          |
| d) 2-12 timer hver dag                                                                                           | <input type="checkbox"/> |                          |
| e) 12-24 timer hver dag                                                                                          | <input type="checkbox"/> |                          |

| Hvilke(n) type(r) sykepleiere?                                                  |  | Flere kryss mulig        |
|---------------------------------------------------------------------------------|--|--------------------------|
| Hjemmesykepleier                                                                |  | <input type="checkbox"/> |
| Spesialsykepleier i:                                                            |  |                          |
| a) Nevrologi                                                                    |  | <input type="checkbox"/> |
| b) Psykiatri                                                                    |  | <input type="checkbox"/> |
| c) Palliativ omsorg                                                             |  | <input type="checkbox"/> |
| d) Annet, vennligst spesifiser:<br>.....(f.eks. sårsykepleier, stomisykepleier) |  | <input type="checkbox"/> |

| Til spørsmål 1-2: Er dette riktig omfang medisinsk oppfølging/sykepleie for deg? |                          |
|----------------------------------------------------------------------------------|--------------------------|
| For lite                                                                         | <input type="checkbox"/> |
| Passe                                                                            | <input type="checkbox"/> |
| For mye                                                                          | <input type="checkbox"/> |
| Hvis det ikke er riktig omfang, hva trenger du?<br>.....<br>.....<br>.....       |                          |

| Denne delen handler om den hjelpen du får til aktiviteter i hjemmet og i lokalmiljøet                                                                                                                                                                       |                          |                          |
|-------------------------------------------------------------------------------------------------------------------------------------------------------------------------------------------------------------------------------------------------------------|--------------------------|--------------------------|
| <b>3. HJELP MED GRUNNLEGGENDE EGENPLEIE I HJEMMET</b><br>Vi ønsker å vite noe om nivået på den hjelpen du får til grunnleggende egenpleie i og rundt hjemmet ditt.<br>(Egenpleie omfatter det å kle på seg, dusje/bade, gå på toalettet, spise og lage mat) |                          |                          |
|                                                                                                                                                                                                                                                             | <b>Ja</b>                | <b>Nei</b>               |
| Har du fått <b>hjelp til grunnleggende egenpleie</b> i løpet av de siste seks månedene?                                                                                                                                                                     | <input type="checkbox"/> | <input type="checkbox"/> |
| Hvis 'ja':                                                                                                                                                                                                                                                  |                          |                          |
| <b>Fikk du hjelp:</b>                                                                                                                                                                                                                                       | <u>Kryss av én</u>       |                          |
| a) Fra <b>1 pleier</b> om gangen                                                                                                                                                                                                                            | <input type="checkbox"/> |                          |
| b) Fra <b>2 eller flere pleiere</b> om gangen                                                                                                                                                                                                               | <input type="checkbox"/> |                          |

|                                                            |                          |
|------------------------------------------------------------|--------------------------|
| <b>Hvis du har fått hjelp til grunnleggende egenpleie:</b> |                          |
| <b>Hvem ga denne hjelpen?</b>                              |                          |
|                                                            | <u>Flere kryss mulig</u> |
| Familiemedlem(mer)                                         | <input type="checkbox"/> |
| Betalt(e) pleier(e)                                        | <input type="checkbox"/> |
| Andre, vennligst spesifiser: .....                         | <input type="checkbox"/> |

|                                                                                      |                          |
|--------------------------------------------------------------------------------------|--------------------------|
| <b>Hvor ofte ble denne hjelpen gitt?</b>                                             |                          |
|                                                                                      | <u>Kryss av én</u>       |
| <b>Av og til</b> - men ikke hver dag                                                 | <input type="checkbox"/> |
| <b>Én gang om dagen</b>                                                              | <input type="checkbox"/> |
| <b>2-3 ganger hver dag</b> - men ikke om natten                                      | <input type="checkbox"/> |
| <b>For det meste av tiden</b> , på grunn av hyppige eller uforutsigbare omsorgsbehov | <input type="checkbox"/> |
| <b>Konstant overvåking</b> og/eller <b>hjelp flere ganger hver natt</b>              | <input type="checkbox"/> |

|                                                                                                                                                 |                          |                          |
|-------------------------------------------------------------------------------------------------------------------------------------------------|--------------------------|--------------------------|
| <b>4. HJELP TIL SOSIALE AKTIVITETER I LOKALMILJØET</b>                                                                                          |                          |                          |
| Vi ønsker å vite hvor ofte du får hjelp til å delta i aktiviteter i lokalmiljøet av støttekontakt, treningskontakt eller brukerstyrt assistent. |                          |                          |
| F.eks. fritid, arbeid eller sosiale sammenkomster                                                                                               |                          |                          |
|                                                                                                                                                 | <b>Ja</b>                | <b>Nei</b>               |
| Har du fått <b>hjelp til aktiviteter i lokalmiljøet</b> de siste seks månedene?                                                                 | <input type="checkbox"/> | <input type="checkbox"/> |
| Hvis 'ja':                                                                                                                                      |                          |                          |
| <b>Du fikk hjelp:</b>                                                                                                                           | <u>Kryss av én</u>       |                          |
| a) Av og til (1-2 dager i uken eller mindre)                                                                                                    | <input type="checkbox"/> |                          |
| b) Regelmessig (3-5 dager i uken)                                                                                                               | <input type="checkbox"/> |                          |
| c) Ofte (6-7 dager i uken)                                                                                                                      | <input type="checkbox"/> |                          |

|                                                                              |                          |
|------------------------------------------------------------------------------|--------------------------|
| <b>Til spørsmål 3-4: Er dette riktig omfang av personlig omsorg for deg?</b> |                          |
| For lite                                                                     | <input type="checkbox"/> |
| Passe                                                                        | <input type="checkbox"/> |
| For mye                                                                      | <input type="checkbox"/> |
| <b>Hvis det ikke er riktig omfang, hva trenger du?</b>                       |                          |
| .....                                                                        |                          |
| .....                                                                        |                          |
| .....                                                                        |                          |

**Denne delen handler om hvilke omfang og typer av behandling/rehabilitering du får**

## 5. BEHANDLING

Vi er interessert i hvor mange ulike typer behandlere du oppsøker, og hvor ofte du oppsøker dem.

F.eks. fysioterapi, ergoterapi, psykologi, logopedi

|                                                                                          | Ja                       | Nei                      |
|------------------------------------------------------------------------------------------|--------------------------|--------------------------|
| Har du fått <b>behandling</b> i løpet av de siste seks månedene?                         | <input type="checkbox"/> | <input type="checkbox"/> |
| Hvis 'ja':                                                                               |                          |                          |
| <b>Har fått behandling fra:</b>                                                          | <u>Kryss av én</u>       |                          |
| a) Bare <b>én enkelt faggruppe</b> (f.eks. fysio- <u>eller</u> ergoterapi)               | <input type="checkbox"/> |                          |
| b) Mer enn én enkelt faggruppe - men som arbeidet <b>hver for seg</b> , ikke som et team | <input type="checkbox"/> |                          |
| c) Mer enn én enkelt faggruppe - <b>som arbeidet sammen i et koordinert team</b>         | <input type="checkbox"/> |                          |

| Hvilke typer behandlere oppsøkte du?                            |                          | Flere kryss mulig |
|-----------------------------------------------------------------|--------------------------|-------------------|
| Fysioterapeut                                                   | <input type="checkbox"/> |                   |
| Ergoterapeut                                                    | <input type="checkbox"/> |                   |
| Logoped                                                         | <input type="checkbox"/> |                   |
| Dietetiker/ernæringsfysiolog                                    | <input type="checkbox"/> |                   |
| Ortopediingeniør / protesemaker                                 | <input type="checkbox"/> |                   |
| Psykolog                                                        | <input type="checkbox"/> |                   |
| Familieterapeut eller annen rådgiver                            | <input type="checkbox"/> |                   |
| Psykiater                                                       | <input type="checkbox"/> |                   |
| Andre, vennligst spesifiser:<br>.....(f.eks. sosionom, optiker) | <input type="checkbox"/> |                   |

| Hvis du har fått behandling:<br>Hvor ofte møtte du behandleren/-e?          |                          | Kryss av én |
|-----------------------------------------------------------------------------|--------------------------|-------------|
| a) Av og til (én time i måneden) eller <b>behandling bare i gruppemøter</b> | <input type="checkbox"/> |             |
| b) <b>Regelmessige individuelle møter</b> - hver eller annenhver uke        | <input type="checkbox"/> |             |
| c) <b>Hyppige individuelle møter</b> - flere ganger i uken                  | <input type="checkbox"/> |             |

| 6. STØTTE FOR Å KOMME TILBAKE I ARBEID ELLER UTDANNING                                                                                                                                                                       |                          |                          |
|------------------------------------------------------------------------------------------------------------------------------------------------------------------------------------------------------------------------------|--------------------------|--------------------------|
| Vi ønsker å få vite hvilken <b>arbeidsrettet støtte</b> du har fått for å komme tilbake til fulltids eller deltidsarbeid eller utdanning. F.eks. yrkesveiledning for uføre, arbeidsrettet omskolering, arbeidsmarkedstiltak. |                          |                          |
|                                                                                                                                                                                                                              | Ja                       | Nei                      |
| Har du fått <b>hjelp/støtte for å komme tilbake i arbeid/utdanning</b> i løpet av de siste seks månedene?                                                                                                                    | <input type="checkbox"/> | <input type="checkbox"/> |
| Hvis 'ja':                                                                                                                                                                                                                   |                          |                          |
| <b>Har fått hjelp:</b>                                                                                                                                                                                                       | <u>Kryss av én</u>       |                          |
| a) Bare for arbeidsrelatert/utdanningsmessig vurdering/rådgivning (1-2 møter)                                                                                                                                                | <input type="checkbox"/> |                          |
| b) Løpende arbeidsrelatert/utdanningsmessig støtte, f.eks. arbeidsmarkedstiltak                                                                                                                                              | <input type="checkbox"/> |                          |
| c) Et formelt yrkesmessig program for arbeids- eller utdanningsrettet støtte, f.eks. yrkesforberedelse, omskolering, tilrettelagt arbeid                                                                                     | <input type="checkbox"/> |                          |

| Til spørsmål 5-6: Er omfanget av rehabiliteringen riktig for deg? |                          |
|-------------------------------------------------------------------|--------------------------|
| For lite                                                          | <input type="checkbox"/> |
| Passe                                                             | <input type="checkbox"/> |
| For mye                                                           | <input type="checkbox"/> |
| Hvis det ikke er riktig omfang, hva trenger du?                   |                          |
| .....                                                             |                          |
| .....                                                             |                          |
| .....                                                             |                          |

| Denne delen handler om omfanget av den sosiale støtten du får.                                                                                                     |                          |                          |
|--------------------------------------------------------------------------------------------------------------------------------------------------------------------|--------------------------|--------------------------|
| 7. SOSIAL RÅDGIVNING OG OPPFØLGING I KOMMUNE                                                                                                                       |                          |                          |
| Vi ønsker å vite noe om <b>hvilken sosial rådgivning og oppfølging</b> du har fått. Dette kan f.eks. være i form av en ansvarsgruppe eller koordinator i kommunen. |                          |                          |
|                                                                                                                                                                    | Ja                       | Nei                      |
| Har du fått <b>sosial rådgivning eller oppfølging</b> i løpet av de siste seks månedene?                                                                           | <input type="checkbox"/> | <input type="checkbox"/> |
| Hvis 'ja':                                                                                                                                                         |                          |                          |
| <b>Har fått hjelp/støtte:</b>                                                                                                                                      | <u>Kryss av én</u>       |                          |
| a) Tilgjengelig for råd når det er nødvendig                                                                                                                       | <input type="checkbox"/> |                          |
| b) 1-2 avtaler                                                                                                                                                     | <input type="checkbox"/> |                          |
| c) 3 eller flere avtaler                                                                                                                                           | <input type="checkbox"/> |                          |

| 8. STØTTE TIL FAMILIEN                                                                      |                          |                          |
|---------------------------------------------------------------------------------------------|--------------------------|--------------------------|
| Vi ønsker å få vite hvilken støtte som er mottatt for eventuelle omsorgspersoner i familien |                          |                          |
|                                                                                             | Ja                       | Nei                      |
| Har du mottatt støtte for omsorgspersoner i familien i løpet av de siste seks månedene?     | <input type="checkbox"/> | <input type="checkbox"/> |
| Hvis 'ja':                                                                                  |                          |                          |
| Mottatt støtte for omsorgspersoner:                                                         | Kryss av én              |                          |
| a) Bare vurdering - for å se hvilken støtte det kunne være behov for                        | <input type="checkbox"/> |                          |
| b) Noe kortsiktig støtte til omsorgspersoner/familie, f.eks. for opptrening av ferdigheter  | <input type="checkbox"/> |                          |
| c) Løpende støtte til omsorgspersoner/familie, f.eks. for følelsesmessig støtte             | <input type="checkbox"/> |                          |

| Denne delen handler om avlastning som gis for at omsorgspersoner i familien skal få en pause                    |                          |                          |
|-----------------------------------------------------------------------------------------------------------------|--------------------------|--------------------------|
| Dette kan skje enten i en avlastningsbolig eller på et dagsenter                                                |                          |                          |
| 9. AVLASTNING                                                                                                   |                          |                          |
| A) Vi ønsker å få vite om behov for fulltids omsorg i en avlastningsbolig, f.eks. et sykehjem eller et hospice. |                          |                          |
|                                                                                                                 | Ja                       | Nei                      |
| Har du mottatt omsorg i en avlastningsbolig i løpet av de siste seks månedene?                                  | <input type="checkbox"/> | <input type="checkbox"/> |
| Hvis 'ja':                                                                                                      |                          |                          |
| Har fått omsorg i en avlastningsbolig:                                                                          | Kryss av én              |                          |
| a) Én gang                                                                                                      | <input type="checkbox"/> |                          |
| b) To ganger                                                                                                    | <input type="checkbox"/> |                          |
| c) Tre eller flere ganger                                                                                       | <input type="checkbox"/> |                          |

| Hvilken type avlastningsbolig?                      |                          |
|-----------------------------------------------------|--------------------------|
|                                                     | Flere kryss mulig        |
| Hjemmebasert omsorg ved hjelp av avlaster i hjemmet | <input type="checkbox"/> |
| Omsorgsbolig                                        | <input type="checkbox"/> |
| Sykehjem                                            | <input type="checkbox"/> |
| Spesialisert sykehjem                               | <input type="checkbox"/> |
| Hospice                                             | <input type="checkbox"/> |
| Annet, vennligst spesifiser: .....                  | <input type="checkbox"/> |



| B) Vi ønsker å få vite noe om behov for <b>omsorg på dagtid</b> , f.eks. på et dagsenter |                          |                          |
|------------------------------------------------------------------------------------------|--------------------------|--------------------------|
|                                                                                          | Ja                       | Nei                      |
| Har du fått <b>omsorg på dagtid</b> i løpet av de siste seks månedene?                   | <input type="checkbox"/> | <input type="checkbox"/> |
| Hvis 'ja':                                                                               |                          |                          |
| <b>Har fått omsorg på dagtid:</b>                                                        | <u>Kryss av én</u>       |                          |
| a) Av og til, f.eks. 1-2 dager i uken                                                    | <input type="checkbox"/> |                          |
| b) Ofte, f.eks. 3-5 dager i uken                                                         | <input type="checkbox"/> |                          |

| Hvilken type omsorg på dagtid?        |                          |
|---------------------------------------|--------------------------|
|                                       | <u>Flere kryss mulig</u> |
| Lokalt dagsenter                      | <input type="checkbox"/> |
| Spesialisert dagsenter                | <input type="checkbox"/> |
| Hospice                               | <input type="checkbox"/> |
| Annet, vennligst spesifiser:<br>..... | <input type="checkbox"/> |

| 10. BEHOV FOR VERGE                                                                                                                                                                                                                                       |                          |
|-----------------------------------------------------------------------------------------------------------------------------------------------------------------------------------------------------------------------------------------------------------|--------------------------|
| En verge er en som kan representere interessene og rettighetene til noen som mangler mental kapasitet til å ta beslutninger på egne vegne.<br>I mange tilfeller vil familien ha denne rollen, men av og til er det behov for en uavhengig oppnevnt verge. |                          |
|                                                                                                                                                                                                                                                           | <u>Kryss av én</u>       |
| <b>I løpet av de siste seks månedene:</b>                                                                                                                                                                                                                 |                          |
| a) Har det <b>ikke vært behov for verge</b>                                                                                                                                                                                                               | <input type="checkbox"/> |
| b) <b>Har fått vurdering av mental kapasitet</b> til å ta beslutninger om omsorg                                                                                                                                                                          | <input type="checkbox"/> |
| c) Mangler mental kapasitet, og <b>familien gir støtte når det skal tas beslutninger</b>                                                                                                                                                                  | <input type="checkbox"/> |
| d) Mangler samtykkekompetanse, og <b>har fått en verge eller legalfullmakt</b>                                                                                                                                                                            | <input type="checkbox"/> |

| Til spørsmål 7-10: Er dette riktig omfang av sosial støtte/familiestøtte for deg? |                          |
|-----------------------------------------------------------------------------------|--------------------------|
| For lite                                                                          | <input type="checkbox"/> |
| Passe                                                                             | <input type="checkbox"/> |
| For mye                                                                           | <input type="checkbox"/> |
| <b>Hvis det ikke er riktig omfang, hva trenger du?</b><br>.....<br>.....<br>..... |                          |

**Denne delen handler om hjelpemidler og utstyr, eller tilpasning av boligen.**

## 11. HJELPEMIDLER

Vi vil vite noe om hvilke **hjelpemidler og utstyr** du har.

|                                                                                                                                                    | Ja                       | Nei                      |
|----------------------------------------------------------------------------------------------------------------------------------------------------|--------------------------|--------------------------|
| Har du mottatt <b>hjelpemidler eller utstyr</b> i løpet av de siste seks månedene?                                                                 | <input type="checkbox"/> | <input type="checkbox"/> |
| Hvis 'ja':                                                                                                                                         |                          |                          |
| <b>Har mottatt hjelpemidler/utstyr:</b>                                                                                                            | <u>Kryss av én</u>       |                          |
| a) Enkelt utstyr som er i fritt salg, f.eks. kjøkkenhjelpemidler, toalettstol, løftebøyle for seng                                                 | <input type="checkbox"/> |                          |
| b) Spesialutstyr som krever faglig vurdering/anskaffelse (f.eks. spesiell rullestol)                                                               | <input type="checkbox"/> |                          |
| c) Høyt spesialisert/spesiallaget utstyr som må rekvireres/det må søkes om (f.eks. miljøkontrollsystemer, kommunikasjonshjelpemidler, pusteutstyr) | <input type="checkbox"/> |                          |

## Hvilke(n) type(r) av utstyr?

Flere kryss mulig

|                                       |                          |
|---------------------------------------|--------------------------|
| Enkel heis/løfteutstyr                | <input type="checkbox"/> |
| Sittemøbler/rullestol                 | <input type="checkbox"/> |
| Støtte til å stå oppreist (rullator)  | <input type="checkbox"/> |
| Elektroniske hjelpemidler             | <input type="checkbox"/> |
| Kommunikasjonshjelpemidler            | <input type="checkbox"/> |
| Hjelpemidler for pustefunksjon        | <input type="checkbox"/> |
| Annet, vennligst spesifiser:<br>..... | <input type="checkbox"/> |

## 12. BOLIG

### a) Hvis du KAN bo i ditt eget hjem:

Vi vil gjerne vite dine behov for tilpasning av boligen.

|                                                                       | Ja                       | Nei                      |
|-----------------------------------------------------------------------|--------------------------|--------------------------|
| Har du en <b>tilpasset bolig</b> ?                                    | <input type="checkbox"/> | <input type="checkbox"/> |
| Hvis 'ja':                                                            |                          |                          |
| <b>Din tilpassede bolig er:</b>                                       | <u>Kryss av én</u>       |                          |
| a) I første etasje eller har tilgang til en pålitelig heis            | <input type="checkbox"/> |                          |
| b) Noe tilpasset (f.eks. håndrekkverk, ramper)                        | <input type="checkbox"/> |                          |
| c) En fullt tilpasset bolig (f.eks. fullt tilgjengelig for rullestol) | <input type="checkbox"/> |                          |

| <b>ELLER b) Hvis du IKKE KAN bo i ditt eget hjem:</b>                                     |                          |                          |
|-------------------------------------------------------------------------------------------|--------------------------|--------------------------|
| Vi ønsker å få vite om boligen har støttefunksjoner eller om du får omsorg i institusjon. |                          |                          |
|                                                                                           | <b>Ja</b>                | <b>Nei</b>               |
| Bor du i en <b>bolig med støttefunksjoner eller på en institusjon?</b>                    | <input type="checkbox"/> | <input type="checkbox"/> |
| Hvis 'ja':                                                                                |                          |                          |
| <b>Din bolig med støttefunksjoner eller institusjon er en:</b>                            | <b>Kryss av én</b>       |                          |
| a) Overvåket boligenhet, f.eks. et bofellesskap for en liten gruppe                       | <input type="checkbox"/> |                          |
| b) Omsorgsbolig, f.eks. med tilsyn                                                        | <input type="checkbox"/> |                          |
| c) Egen bolig med hjemmesykepleie                                                         | <input type="checkbox"/> |                          |
| d) Sykehjem                                                                               | <input type="checkbox"/> |                          |
| e) Spesialisert sykehjem                                                                  | <input type="checkbox"/> |                          |
| f) Hospice                                                                                | <input type="checkbox"/> |                          |

| <b>Til spørsmål 11-12: Er dette riktig omfang av hjelpemidler/boligtilbud for deg?</b> |                          |
|----------------------------------------------------------------------------------------|--------------------------|
| For lite                                                                               | <input type="checkbox"/> |
| Passe                                                                                  | <input type="checkbox"/> |
| For mye                                                                                | <input type="checkbox"/> |
| <b>Hvis det ikke er riktig omfang, hva trenger du?</b>                                 |                          |
| .....                                                                                  |                          |
| .....                                                                                  |                          |
| .....                                                                                  |                          |

| <b>13. PRIVATE TJENESTER</b>                                                   |                      |
|--------------------------------------------------------------------------------|----------------------|
| Betaler du i dag for noen private rehabiliterings- eller medisinske tjenester? |                      |
| Sett en ring rundt svaret:                                                     |                      |
|                                                                                | <b>Ja</b> <b>Nei</b> |
| Hvis ja, hvilke tjenester?                                                     |                      |
| .....                                                                          |                      |
| .....                                                                          |                      |
| .....                                                                          |                      |
| .....                                                                          |                      |

#### 14. VENTELISTE

Står du på venteliste for noen rehabiliterings- eller støttetjenester?

Sett en ring rundt svaret:

Ja

Nei

Hvis ja, hvilke tjenester?

.....

....

.....

Når er de forventet å starte? .....

.....
